# Supplementary material
Source: publisher site journal article supplement (https://www.spandidos-publications.com/4554/downloadSupplementary)

Figure S1. Western blotting was performed to determine the protein expression levels of NUF2 in siCtrl and siNUF2 transfected HGC27 cells. The protein expression levels of were normalized to GAPDH. NUF2, NUF2 component of NDC80 kinetochore complex; si, small interfering RNA; Ctrl, control.

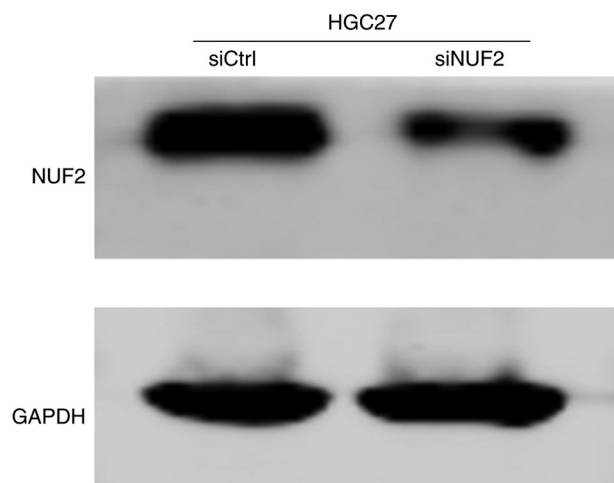

Supplement: Supplementary file 1 [file downloadSupplementary]
